# Supplementary material for: Adiposity and breast cancer risk in postmenopausal women: Results from the UK Biobank prospective cohort
Source: PubMed Central journal article supplement (PMC6099222; doi:10.1002/ijc.31394), 2018-04-10

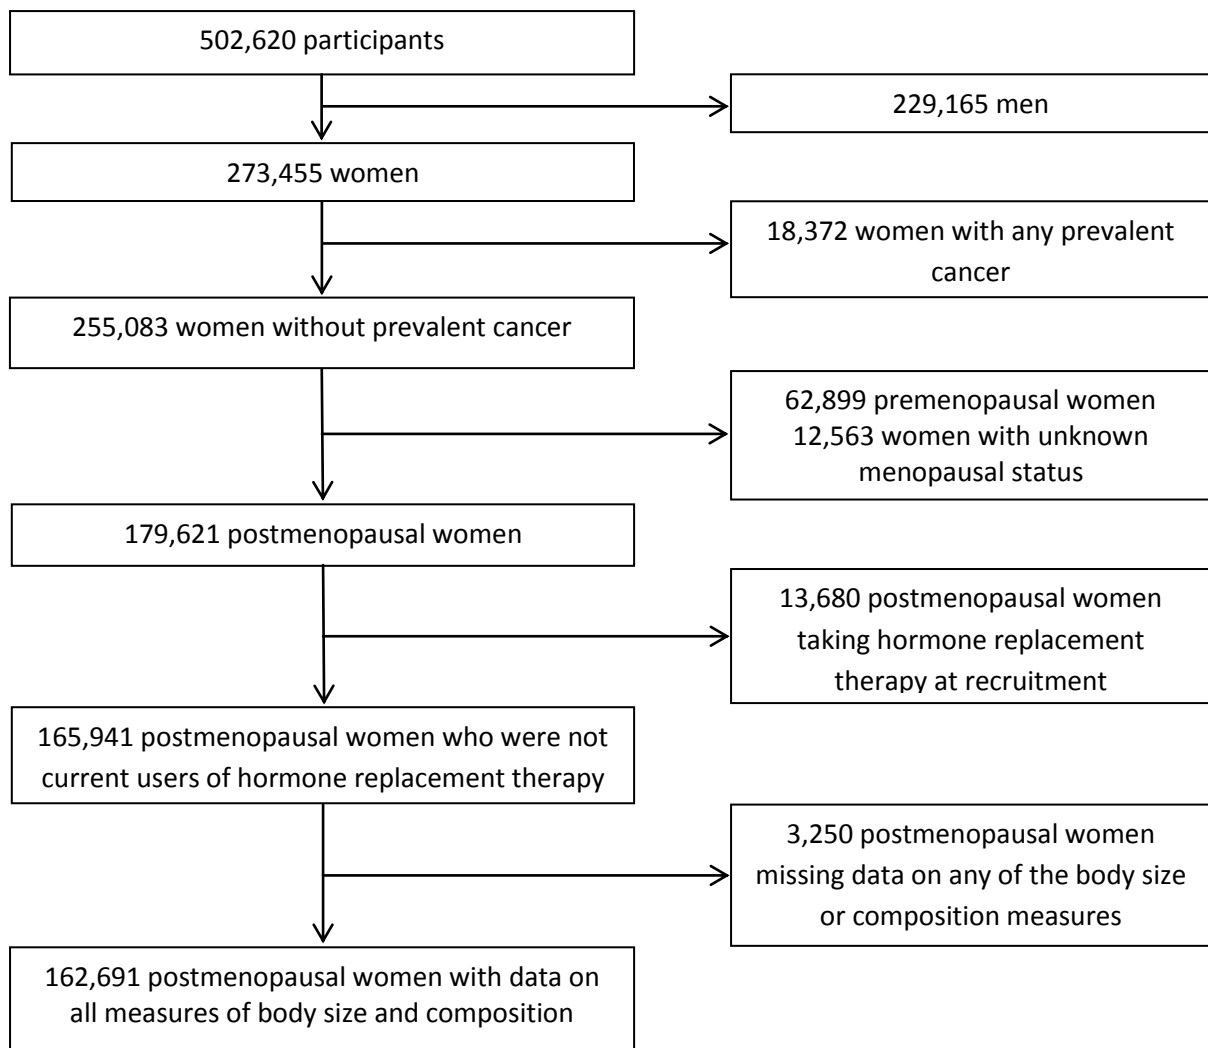

Supplement: IJC-143-1037-s001.pdf [file IJC-143-1037-s001.pdf]
